# Supplementary material
Source: ML conference proceedings conference paper supplement (https://openaccess.thecvf.com/content/CVPR2023/html/Wei_Towards_Realistic_Long-Tailed_CVPR_2023_paper.html)
Supplement: Supplementary file 1 [file Wei_Towards_Realistic_Long-Tailed_CVPR_2023_supplemental.pdf]

# Supplementary Material for Towards Realistic Long-Tailed Semi-Supervised Learning: Consistency Is All You Need

## 1. More Experimental Details

Our experiments are run on NVIDIA GeForce RTX 3090. In the implementation of the proposed method, we use PyTorch 1.12.0 and Torchvision 0.13.0.

**Datasets.** In our experiments, we compare the proposed algorithm ACR with existing state-of-the-art methods on several datasets under various unlabeled data class distributions, e.g., *consistent*, *uniform*, and *reversed*.

- **CIFAR-10-LT and CIFAR-100-LT:** There are 5000 and 500 samples in CIFAR-100 and CIFAR-100 originally, with the image size of  $32 \times 32$ . The entire CIFAR dataset can be downloaded from <https://www.cs.toronto.edu/kriz/cifar.html>. We need to manually construct the imbalanced dataset according to  $N_1, M_1$  ( $M_C$  for *reversed*), and the imbalance ratio as we describe in our paper. We calculate the top-1 accuracy for measuring the performance of each method.
- **STL10-LT:** STL-10 includes 5000 labeled samples and 100k samples without labels initially, so ground-truth labels of unlabeled data in STL-10 are unknown. We train the model with a long-tailed labeled dataset constructed artificially and the whole 100k unlabeled data. The image size of each sample is  $96 \times 96$ , and the dataset can be downloaded at <https://cs.stanford.edu/acoates/stl10/>.
- **ImageNet-127:** ImageNet127 is a naturally long-tailed dataset. The dataset can be downloaded from <https://image-net.org/download-images>. Following CoSSL [1], we use the image size of  $32 \times 32$  and  $64 \times 64$  for training.

## 2. Pseudo-code for Our ACR Algorithm

Algorithm 1 summarizes the whole framework of the proposed ACR. We also include the source code for ACR in the supplementary.

---

### Algorithm 1 Adaptive Consistency Regularizer (ACR)

---

**Input:** labeled dataset  $\mathcal{D}^l$  and unlabeled dataset  $\mathcal{D}^u$ , standard classifier  $f$  and balanced classifier  $\tilde{f}$ , class prior of labeled dataset  $\pi$ , estimated unlabeled dataset class distribution  $\pi_{est}$ , number of iterations in each epoch  $K$ , scaling parameter  $\tau$ , three anchor distributions.

**Require:** Strong augmentations  $\mathcal{A}$ .

Calculate the distance between  $\pi_{est}$  and three anchor distributions and obtain the adaptive  $\tau(t)$  according to Equation (7)

**for**  $k = 1$  **to**  $K$  **do**

$\{(x_i^{(l)}, y_i^{(l)})\}_{i=0}^{B-1} \leftarrow$  Sample a batch of labeled data

$\{x_j^{(u)}\}_{j=0}^{B-1} \leftarrow$  Sample a batch of unlabeled data

$q(x_j^{(u)}) \leftarrow \arg \max f(x_j^{(u)}) - \tau(t) \cdot \log \pi$

$\tilde{q}(x_j^{(u)}) \leftarrow \arg \max \tilde{f}(x_j^{(u)}) - \tau \cdot \log \pi$

Update estimated class distribution  $\pi_{est}$  according to pseudo-labels  $\tilde{f}(x_j^{(u)})$

Generate sample masks  $M$  and  $\tilde{M}$  for standard and balanced branch respectively based on Equation (8)

$\mathcal{L}^{labeled} \leftarrow \sum_{i=0}^{B-1} \ell(f(x_i^{(l)}), y_i^{(l)})$

$\mathcal{L}^{b-labeled} \leftarrow \sum_{i=0}^{B-1} \ell(\tilde{f}(x_i^{(l)}), y_i^{(l)})$

$\mathcal{L}^{con} \leftarrow \sum_{j=0}^{B-1} M(x_j^{(u)}) \ell(f(\mathcal{A}(x_j^{(u)})), q(x_j^{(u)}))$

$\mathcal{L}^{b-con} \leftarrow \sum_{j=0}^{B-1} \tilde{M}(x_j^{(u)}) \ell(\tilde{f}(\mathcal{A}(x_j^{(u)})), \tilde{q}(x_j^{(u)}))$

$\mathcal{L}^{total} = \mathcal{L}^{labeled} + \mathcal{L}^{con} + \mathcal{L}^{b-labeled} + \mathcal{L}^{b-con}$

Update  $f$  and  $\tilde{f}$  based on  $\nabla \mathcal{L}^{total}$  using SGD

**end for**

---

## 3. Additional Experimental Results

In this section, we report more results to show the effectiveness of ACR and detailed analysis to help better understand the approach.

**More results compared with DASO.** To further illustrate the superior performance of our method in the case of *uniform* and *reversed* class distributions of unlabeled dataset, we combine our ACR with DASO w/ LA and DASO w/ ABC on three datasets. The results are reported in Ta-

| Algorithm       | CIFAR10-LT( $\gamma_l \neq \gamma_u$ ) |                              |                                     |                              | STL10-LT( $\gamma_l = N/A$ ) |                             |                             |                             |
|-----------------|----------------------------------------|------------------------------|-------------------------------------|------------------------------|------------------------------|-----------------------------|-----------------------------|-----------------------------|
|                 | $\gamma_u = 1(\text{uniform})$         |                              | $\gamma_u = 1/100(\text{reversed})$ |                              | $\gamma_l = 10$              |                             | $\gamma_l = 20$             |                             |
|                 | $N_1 = 500$<br>$M_1 = 4000$            | $N_1 = 1500$<br>$M_1 = 3000$ | $N_1 = 500$<br>$M_1 = 4000$         | $N_1 = 1500$<br>$M_1 = 3000$ | $N_1 = 150$<br>$M_1 = 100k$  | $N_1 = 450$<br>$M_1 = 100k$ | $N_1 = 150$<br>$M_1 = 100k$ | $N_1 = 450$<br>$M_1 = 100k$ |
| FixMatch [5]    | 73.0 $\pm$ 3.81                        | 81.5 $\pm$ 1.15              | 62.5 $\pm$ 0.94                     | 71.8 $\pm$ 1.70              | 56.1 $\pm$ 2.32              | 72.4 $\pm$ 0.71             | 47.6 $\pm$ 4.87             | 64.0 $\pm$ 2.27             |
| w/ DASO [4]     | 86.6 $\pm$ 0.84                        | 88.8 $\pm$ 0.59              | 71.0 $\pm$ 0.95                     | 80.3 $\pm$ 0.65              | 70.0 $\pm$ 1.19              | 78.4 $\pm$ 0.80             | 65.7 $\pm$ 1.78             | 75.3 $\pm$ 0.44             |
| w/ LA [3]+DASO  | 84.6 $\pm$ 2.04                        | 86.8 $\pm$ 0.76              | 72.6 $\pm$ 0.38                     | 78.5 $\pm$ 1.31              | 72.7 $\pm$ 1.45              | 79.7 $\pm$ 0.44             | 66.8 $\pm$ 0.62             | 75.8 $\pm$ 0.50             |
| w/ ABC [2]+DASO | 85.2 $\pm$ 1.56                        | 88.4 $\pm$ 0.82              | 70.1 $\pm$ 1.25                     | 79.8 $\pm$ 0.21              | 71.8 $\pm$ 1.17              | 78.4 $\pm$ 0.58             | 67.3 $\pm$ 2.06             | 75.9 $\pm$ 0.43             |
| w/ ACR (ours)   | <b>92.1</b> $\pm$ 0.18                 | <b>93.5</b> $\pm$ 0.11       | <b>85.0</b> $\pm$ 0.09              | <b>89.5</b> $\pm$ 0.17       | <b>77.1</b> $\pm$ 0.24       | <b>83.0</b> $\pm$ 0.32      | <b>75.1</b> $\pm$ 0.70      | <b>81.5</b> $\pm$ 0.25      |

Table 1. Test accuracy of DASO combined with LA or ABC and our proposed ACR under *uniform* and *reversed* class distributions, i.e.,  $\gamma_l \neq \gamma_u$ , on CIFAR10-LT and STL10-LT datasets. The  $\gamma_l$  is fixed to 100 for CIFAR10-LT, while it is set to 10 and 20 for STL10-LT dataset. The best results are in **bold**.

| Algorithm       | CIFAR100-LT( $\gamma_l \neq \gamma_u$ ) |                            |                                    |                            |
|-----------------|-----------------------------------------|----------------------------|------------------------------------|----------------------------|
|                 | $\gamma_u = 1(\text{uniform})$          |                            | $\gamma_u = 1/10(\text{reversed})$ |                            |
|                 | $N_1 = 50$<br>$M_1 = 400$               | $N_1 = 150$<br>$M_1 = 300$ | $N_1 = 50$<br>$M_1 = 400$          | $N_1 = 150$<br>$M_1 = 300$ |
| FixMatch [5]    | 45.5 $\pm$ 0.71                         | 58.1 $\pm$ 0.72            | 44.2 $\pm$ 0.43                    | 57.3 $\pm$ 0.19            |
| w/ DASO [4]     | 53.9 $\pm$ 0.66                         | 61.8 $\pm$ 0.98            | 51.0 $\pm$ 0.19                    | 60.0 $\pm$ 0.31            |
| w/ LA [3]+DASO  | 54.7 $\pm$ 0.40                         | 62.4 $\pm$ 1.06            | 51.1 $\pm$ 0.12                    | 60.5 $\pm$ 0.23            |
| w/ ABC [2]+DASO | 53.4 $\pm$ 0.53                         | 62.4 $\pm$ 0.61            | 51.2 $\pm$ 0.19                    | 60.8 $\pm$ 0.39            |
| w/ ACR (ours)   | <b>66.0</b> $\pm$ 0.25                  | <b>73.4</b> $\pm$ 0.22     | <b>57.0</b> $\pm$ 0.46             | <b>67.6</b> $\pm$ 0.12     |

Table 2. Test accuracy on CIFAR100-LT dataset under *uniform* and *reversed* class distributions. DASO combines LA and ABC to enhance its re-balancing ability. The best results are in **bold**.

ble 1 and Table 2. As we can see, ACR significantly outperforms competing methods with an average 7.9% performance gain, indicating the strong performance of ACR.

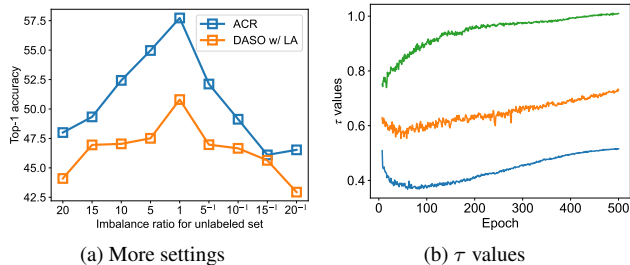

Figure 1. (1a): More realistic LTSSL settings on CIFAR100-LT. (1b): The adaptive  $\tau$  values when training CIFAR100-LT.

**More settings on CIFAR100-LT.** We evaluate our proposed algorithm ACR under more types of class distributions of unlabeled data on CIFAR100-LT dataset. The result is illustrated in Figure 1a. In this experiment, we fix  $\gamma_l = 20$  and vary  $\gamma_u$  from *consistent* to *reversed* by a step size of 5. We set  $N_1 = 50$  and  $M_1 = 400$  ( $M_C = 400$  for *reversed*), and compare the performance with DASO w/ LA. It can be seen that ACR outperforms DASO w/ LA in all settings, showing the superior performance of ACR when dealing with various unlabeled class distributions.

**Adaptive  $\tau$  values on CIFAR100-LT.** We investigate the

adaptive change of  $\tau$  values on CIFAR100-LT dataset in Figure 1b. We can see that the scaling parameter  $\tau$  increases its value from *consistent* to *reversed* settings, which coincides with observation on CIFAR10-LT illustrated in the main paper.

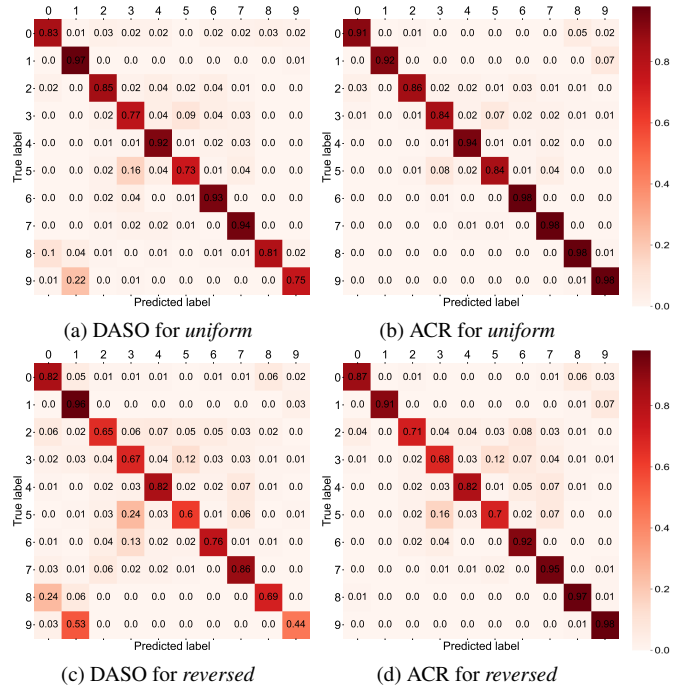

Figure 2. The confusion matrices of the test set for DASO and ACR on CIFAR-10-LT dataset in *uniform* and *reversed* settings.

**Confusion matrices on test set.** We compare ACR and DASO [4] under *uniform* and *reversed* unlabeled data class distributions by calculating their confusion matrices in Figure 2. We have two key observations: 1) ACR achieves higher overall accuracy for classes and 2) ACR significantly improves the minority class accuracy. On the contrary, DASO produces biased predictions toward the majority class.

**Precision and Recall of pseudo-labels.** In this experiment,

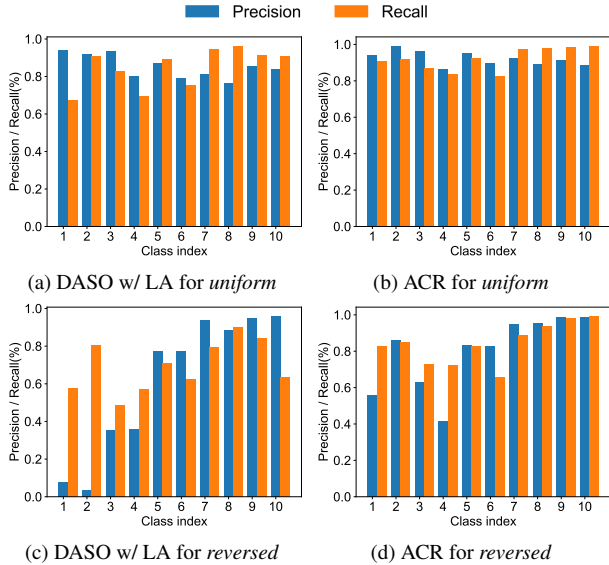

Figure 3. The precision and recall of pseudo-labels for DASO and ACR on CIFAR-10-LT dataset in *uniform* and *reversed* settings.

we investigate the quality of pseudo-labels generated by our method. The results are illustrated in Figure 3. Interestingly, ACR produces pseudo-labels of high quality in both *uniform* and *reversed* settings. As we can see, ACR significantly improves the precision and recall of pseudo-labels compared with DASO w/ LA, showing the effectiveness of the proposed adaptive logit adjustment.

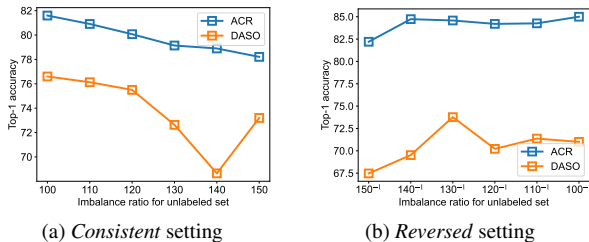

Figure 4. Accuracy on CIFAR10-LT of various imbalance ratios.

**What if the target distribution is more imbalanced?** We fix the labeled data imbalance ratio as  $\gamma_l = 100$  and design the unlabeled data to be more class-imbalanced. Results in Figure 4 indicate that our method (ACR) consistently outperforms DASO by large margins, showing its capability to generalize to various target distributions.

**Fine-grained results.** Here, we report the fine-grained accuracy on the test set in Table 3. ACR achieves impressive improvements on few-shot classes compared with previous state-of-the-art method (DASO) at the cost of negligible drop under the *consistent* setting. For other settings, ACR outperforms DASO in all cases, indicating its strong generalization ability for both head and tail classes.

| Setup | Consistent ( $\gamma_u = 100$ ) |        |      |      | Uniform ( $\gamma_u = 1$ ) |        |      |      | Reversed ( $\gamma_u = 1/100$ ) |        |      |      |
|-------|---------------------------------|--------|------|------|----------------------------|--------|------|------|---------------------------------|--------|------|------|
|       | Many                            | Medium | Few  | All  | Many                       | Medium | Few  | All  | Many                            | Medium | Few  | All  |
| DASO  | 95.1                            | 78.6   | 60.4 | 78.1 | 89.6                       | 84.4   | 85.7 | 86.3 | 84.0                            | 71.6   | 68.2 | 74.3 |
| Ours  | 93.9                            | 81.6   | 75.3 | 83.4 | 92.8                       | 90.6   | 97.9 | 93.5 | 90.7                            | 83.8   | 96.4 | 89.7 |

Table 3. Fine-grained accuracy on CIFAR10-LT ( $\gamma_l = 100$ ).

**Effect of the class imbalance ratio and the amount of labeled data.** We illustrate the performance by varying the imbalance ratio and amount of labeled data in Figure 4 and Table 4, respectively. ACR outperforms DASO in all cases even under very high class imbalance ratios. Also, more results can be found in Figure 3 (main paper) and Figure 1a. Concerning the amount of labeled data, ACR improves DASO by an average 4.7% test accuracy.

| Dataset | CIFAR10-LT |              |               | CIFAR100-LT |              |               |
|---------|------------|--------------|---------------|-------------|--------------|---------------|
|         | $ D^l $    | 0.5 $\times$ | 0.75 $\times$ | 1 $\times$  | 0.5 $\times$ | 0.75 $\times$ |
| DASO    | 66.6       | 77.3         | 79.1          | 48.3        | 56.7         | 59.2          |
| Ours    | 73.9       | 80.3         | 84.1          | 51.3        | 60.3         | 65.6          |

Table 4. Accuracy on two datasets with various amount of labeled data (e.g., 0.5 $\times$  means a half of the initial labeled data is used).

**Self-supervised pre-training baseline.** Following [6], we train SimCLR using all data and fine-tune the model on the labeled set. We find that its performance is even worse than FixMatch (8.8% accuracy drop). This is because the limited labeled data is not enough for model fine-tuning. Moreover, by generating high-quality pseudo-labels, methods based on FixMatch leverage unlabeled data more effectively than self-supervised learning.

| Dataset  | CIFAR10-LT |      |      | CIFAR100-LT |      |      |
|----------|------------|------|------|-------------|------|------|
|          | $\gamma_u$ | 100  | 1    | 1/100       | 10   | 1    |
| SSP      | 64.9       | 70.6 | 68.7 | 48.4        | 49.6 | 47.9 |
| FixMatch | 77.5       | 81.5 | 71.8 | 56.5        | 58.1 | 57.3 |

Table 5. Performance comparison between SSP and FixMatch. The labeled imbalance ratio  $\gamma_l$  is fixed 10 and 100 for CIFAR10-LT and CIFAR100-LT, respectively

## References

- [1] Yue Fan, Dengxin Dai, Anna Kukleva, and Bernt Schiele. Coss: Co-learning of representation and classifier for imbalanced semi-supervised learning. In *Proceedings of the IEEE/CVF Conference on Computer Vision and Pattern Recognition*, pages 14574–14584, 2022. 1
- [2] Hyuck Lee, Seungjae Shin, and Heeyoung Kim. Abc: Auxiliary balanced classifier for class-imbalanced semi-supervised learning. *Advances in Neural Information Processing Systems*, 34:7082–7094, 2021. 2
- [3] Aditya Krishna Menon, Sadeep Jayasumana, Ankit Singh Rawat, Himanshu Jain, Andreas Veit, and Sanjiv Kumar.

- Long-tail learning via logit adjustment. In *International Conference on Learning Representations*, 2020. [2](#)
- [4] Youngtaek Oh, Dong-Jin Kim, and In So Kweon. Daso: Distribution-aware semantics-oriented pseudo-label for imbalanced semi-supervised learning. In *Proceedings of the IEEE/CVF Conference on Computer Vision and Pattern Recognition*, pages 9786–9796, 2022. [2](#)
- [5] Kihyuk Sohn, David Berthelot, Nicholas Carlini, Zizhao Zhang, Han Zhang, Colin A Raffel, Ekin Dogus Cubuk, Alexey Kurakin, and Chun-Liang Li. Fixmatch: Simplifying semi-supervised learning with consistency and confidence. *Advances in Neural Information Processing Systems*, 33:596–608, 2020. [2](#)
- [6] Yuzhe Yang and Zhi Xu. Rethinking the value of labels for improving class-imbalanced learning. *Advances in neural information processing systems*, 33:19290–19301, 2020. [3](#)
